# Supplementary material
Source: PubMed Central journal article supplement (PMC2745181)
Supplement: NIHMS125436-supplement-SI.pdf [file NIHMS125436-supplement-SI.pdf]

# Organocatalyzed enantioselective synthesis of 6-amino-5-cyanodihydropyrano[2,3-c]pyrazoles

Sanjib Gogoi and Cong-Gui Zhao\*

*Department of Chemistry, University of Texas at San Antonio,  
One UTSA Circle, San Antonio, Texas 78249-0698*

## Supplementary Data

|                                              |     |
|----------------------------------------------|-----|
| <b>General Information</b> .....             | S-1 |
| <b>General Experimental Procedures</b> ..... | S-1 |
| <b>NMR Data of a New Compound</b> .....      | S-2 |
| <b>NMR Spectra of the New Compound</b> ..... | S-4 |
| <b>HPLC Analysis Spectra</b> .....           | S-5 |

### General Information

<sup>1</sup>H and <sup>13</sup>C NMR spectra were recorded on an Advanced Varian-500 (500 MHz) instrument using residual solvent as the standard. TLC was performed with silica gel GF<sub>254</sub> precoated on aluminium plates (VWR), and spots were visualized with UV and/or iodine vapor. Flash column chromatography was performed on silica-gel (VWR, Fisher). HPLC were recorded on a Shimadzu HPLC system with a Daicel ChiralPak AS column. Unless otherwise indicated, chemicals and solvents used in the reactions and in the synthesis of the catalysts were purchased from Aldrich, Acros, TCI America, Alfa Aesar, or Fisher Scientific, and used as received. THF and ether were distilled from benzophenone and sodium metal. Benzene, toluene, and CH<sub>2</sub>Cl<sub>2</sub> were distilled from CaH<sub>2</sub>. Unless otherwise specified, all reactions were carried out at ambient temperature in oven-dried glassware.

**Representative experimental procedure for the two-component synthesis (12a-k, Table 2):** To a stirred solution of 3-methyl-2-pyrazolin-5-one (**10a**, 9.8 mg, 0.10 mmol) and benzylidenemalononitrile (**11a**, 15.4 mg, 0.10 mmol) in anhydrous CH<sub>2</sub>Cl<sub>2</sub> (2.0 mL) was added cupreine **2** (1.6 mg, 0.005 mmol). The reaction mixture was then stirred at

room temperature for 27 h. The solvent was then removed under reduced pressure. The crude mixture was subjected to flash column chromatography over silica gel (1:1 hexane/EtOAc) to furnish pure **12a** as a white solid (23.2 mg, 92%). The ee value of this product was determined to be 96% ee.

Except for product **12e**, all the other products obtained in this study are known compounds and have identical spectroscopic properties as those reported ones.<sup>2-6</sup>

**Representative experimental procedure for the three-component synthesis (Table**

**3):** To a stirred solution of benzaldehyde (**13a**, 10.6 mg, 0.10 mmol) and malononitrile (**14**, 6.6 mg, 0.10 mmol), 3-methyl-2-pyrazolin-5-one (**10a**, 9.8 mg, 0.1 mmol) in anhydrous CH<sub>2</sub>Cl<sub>2</sub> (2.0 mL) was added anhydrous Na<sub>2</sub>SO<sub>4</sub> (14.2 mg, 0.10 mmol) and catalyst **2** (1.6 mg, 0.005 mmol). The reaction mixture was then stirred at room temperature for 25 h. After filtration and washing with some additional CH<sub>2</sub>Cl<sub>2</sub>, the solvent was removed under reduced pressure. The crude mixture was subjected to flash column chromatography over silica gel (1:1 hexane/EtOAc) to furnish **12a** as a white solid (17.4 mg, 69%, 99% ee).

**Representative experimental procedure for the four-component synthesis (Table 4):**

A mixture of hydrazine hydrate (**15**, 5.0 mg, 0.10 mmol) and ethyl acetoacetate (**16**, 13.0 mg, 0.10 mmol) was stirred at room temperature for 5 minutes. The mixture was then cooled to 0 °C. To this reaction mixture, CH<sub>2</sub>Cl<sub>2</sub> (2.0 mL), benzaldehyde (**13a**, 10.6 mg, 0.10 mmol) and malononitrile (**14**, 6.6 mg, 0.10 mmol) was added, which was followed by the addition of anhydrous Na<sub>2</sub>SO<sub>4</sub>, (28.4 mg, 0.20 mmol) and catalyst **2** (1.6 mg, 0.005 mmol). The mixture was further stirred at the same temperature for 28 h. After filtration and washing with some additional CH<sub>2</sub>Cl<sub>2</sub>, the solvent was removed under reduced pressure. The crude mixture was subjected to flash column chromatography over silica gel (1:1 hexane/EtOAc) to furnish **12a** as a white solid (10.8 mg, 43%, >99% ee).

**NMR data of a new compound:**

**6-Amino-5-cyano-4-(4-iodophenyl)-3-methyl-2,4-dihydropyrano[2,3-*c*]pyrazole  
(12e):**

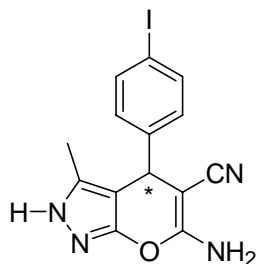

$^1\text{H}$  NMR (500 MHz,  $\text{DMSO-}d_6$ )  $\delta$  1.79 (s, 3H), 4.59 (s, 1H), 6.70-7.20 (m, 4H), 7.68 (s, 2H), 12.18 (s, 1H) ppm.  $^{13}\text{C}$  NMR (125 MHz,  $\text{DMSO-}d_6$ )  $\delta$  9.2, 35.3, 56.2, 92.2, 96.6, 120.1, 129.5, 135.3, 136.9, 143.9, 154.2, 160.5 ppm. IR ( $\text{CHCl}_3$ )  $\nu_{\text{max}}$  1638, 1595, 1488, 1403  $\text{cm}^{-1}$ .

## STANDARD PROTON PARAMETERS

Archive directory: /export/home/vnmr1/vnmrsys/data  
 Sample directory:  
 File: PROTON

Pulse Sequence: s2pu1

Solvent: DMSO  
 Ambient temperature  
 INOVA-500 "Inova500"

Relax. delay 1.000 sec  
 Pulse 25.5 degrees  
 Acq. time 1.892 sec  
 Width 7995.2 Hz  
 32 repetitions  
 OBSERVE H1, 499.6531967 MHz  
 DATA PROCESSING  
 FT size 32768  
 Total time 1 min, 32 sec

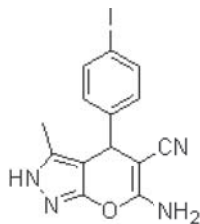

12e

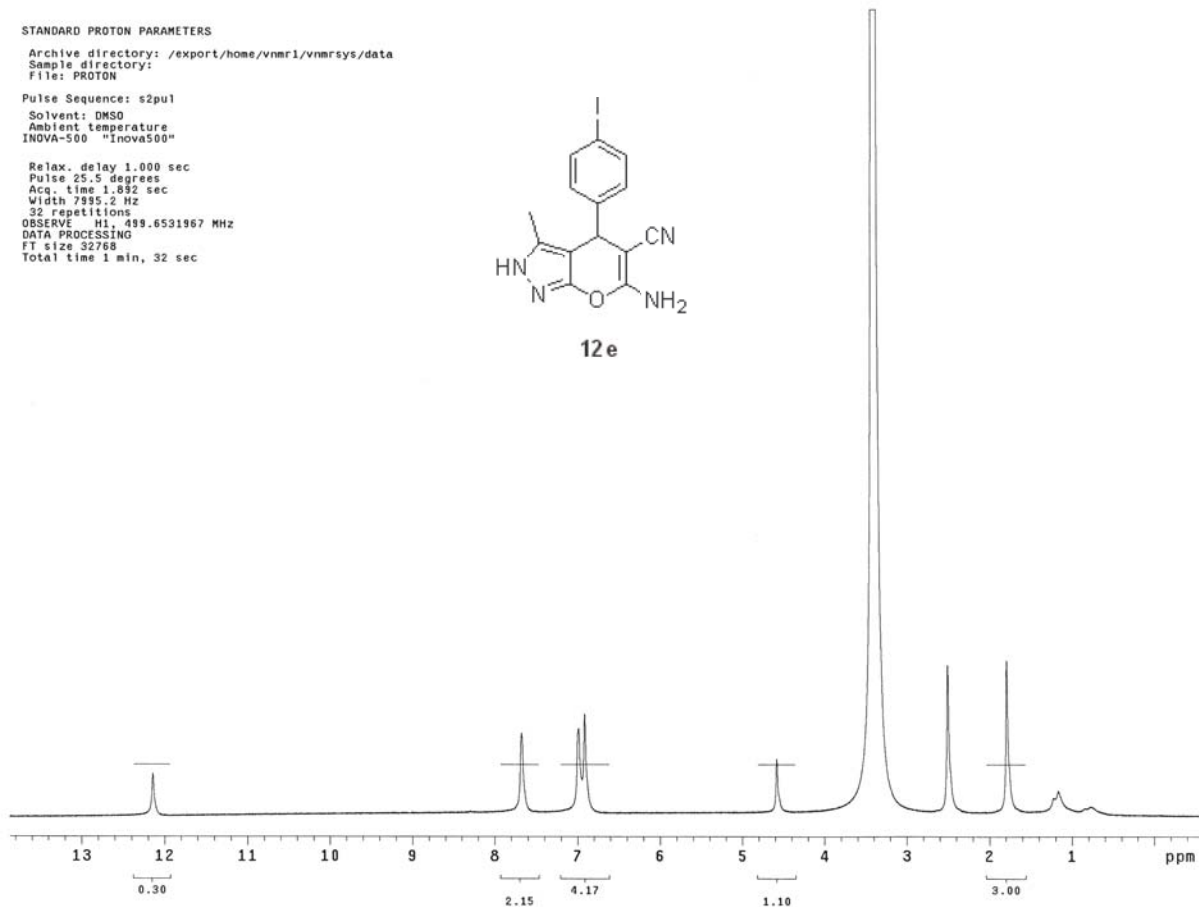

## STANDARD CARBON PARAMETERS

Archive directory: /export/home/vnmr1/vnmrsys/data  
 Sample directory:  
 File: CARBON

Pulse Sequence: s2pu1

Solvent: DMSO  
 Ambient temperature  
 User: 1-14-87  
 INOVA-500 "Inova500"

Relax. delay 1.000 sec  
 Pulse 45.0 degrees  
 Acq. time 1.300 sec  
 Width 31409.5 Hz  
 10000 repetitions  
 OBSERVE C13, 125.6380115 MHz  
 DECOUPLE H1, 499.6557171 MHz  
 Power 36 dB  
 continuously on  
 WALTZ-16 modulated  
 DATA PROCESSING  
 Line broadening 0.5 Hz  
 FT size 131072  
 Total time 6 hr, 24 min, 53 sec

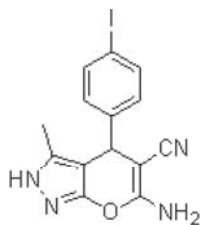

12e

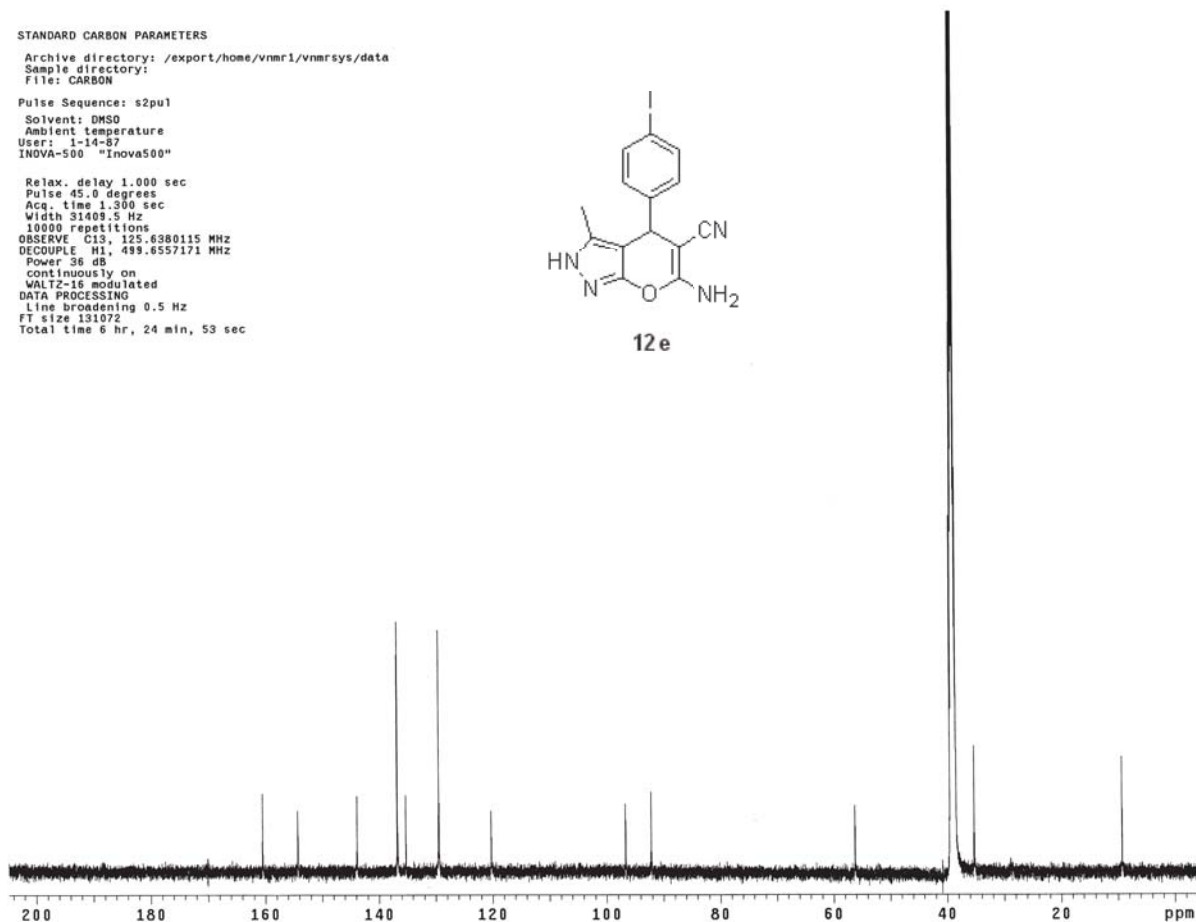

### Area % Report

Method Name: C:\EZStart\Projects\Default\Methods\OJ-H.met  
 Data: C:\EZStart\Projects\Default\Data\I-SG-65-rac-254-15%-1mL-AS-ra  
 User: System  
 Acquired: 9/12/2008 4:58:02 PM  
 Printed: 12/21/2008 1:10:41 PM

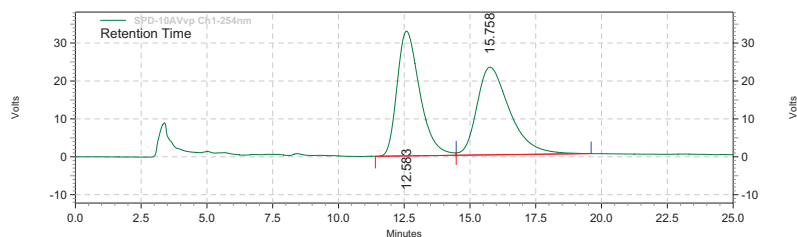

SPD-10AVvp  
Ch1-254nm  
Results

| Retention Time | Area    | Area % | Height | Height % |
|----------------|---------|--------|--------|----------|
| 12.583         | 1978161 | 49.60  | 32929  | 58.72    |
| 15.758         | 2009902 | 50.40  | 23151  | 41.28    |

| Totals | Area    | Area % | Height | Height % |
|--------|---------|--------|--------|----------|
|        | 3988063 | 100.00 | 56080  | 100.00   |

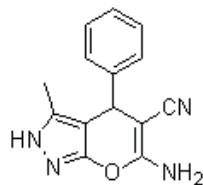

12 a (racemic)

### Area % Report

Method Name: C:\EZStart\Projects\Default\Methods\OJ-H.met  
 Data: C:\EZStart\Projects\Default\Data\I-SG-95  
 User: System  
 Acquired: 9/24/2008 9:37:00 AM  
 Printed: 12/21/2008 1:14:50 PM

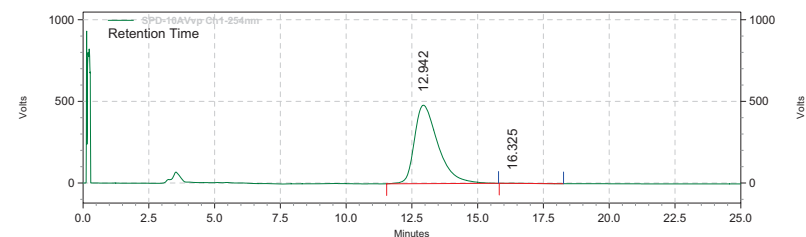

SPD-10AVvp  
Ch1-254nm  
Results

| Retention Time | Area     | Area % | Height | Height % |
|----------------|----------|--------|--------|----------|
| 12.942         | 29872863 | 99.90  | 480345 | 99.84    |
| 16.325         | 29391    | 0.10   | 762    | 0.16     |

| Totals | Area     | Area % | Height | Height % |
|--------|----------|--------|--------|----------|
|        | 29902254 | 100.00 | 481107 | 100.00   |

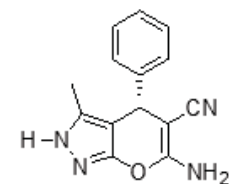

12 a (>99% ee, entry 7 of Table 4)

### Area % Report

Method Name: C:\EZStart\Projects\Default\Methods\OJ-H.met  
 Data: C:\EZStart\Projects\Default\Data\I-SG-215-15%-254-1mL-215  
 User: System  
 Acquired: 10/21/2008 5:25:44 PM  
 Printed: 12/21/2008 1:23:34 PM

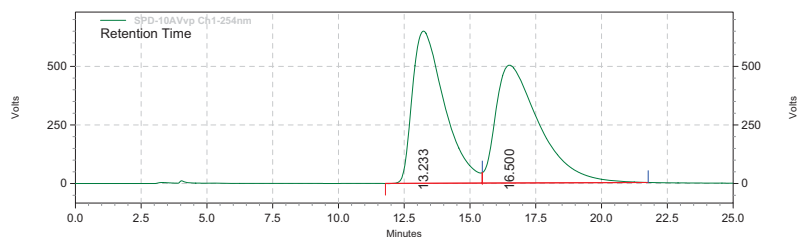

SPD-10AVvp  
Ch1-254nm  
Results

| Retention Time | Area     | Area % | Height | Height % |
|----------------|----------|--------|--------|----------|
| 13.233         | 55282328 | 48.89  | 649150 | 56.36    |
| 16.500         | 57802446 | 51.11  | 502644 | 43.64    |

| Totals | Area      | Area % | Height  | Height % |
|--------|-----------|--------|---------|----------|
|        | 113084774 | 100.00 | 1151794 | 100.00   |

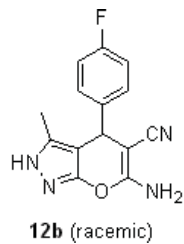

### Area % Report

Method Name: C:\EZStart\Projects\Default\Methods\OJ-H.met  
 Data: C:\EZStart\Projects\Default\Data\I-SG-215-15%-254-1mL-214  
 User: System  
 Acquired: 10/21/2008 6:11:20 PM  
 Printed: 12/21/2008 1:22:21 PM

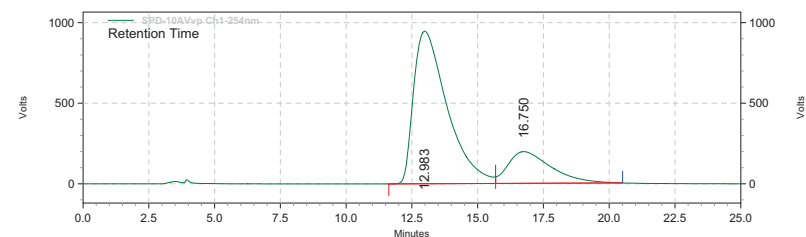

SPD-10AVvp  
Ch1-254nm  
Results

| Retention Time | Area     | Area % | Height | Height % |
|----------------|----------|--------|--------|----------|
| 12.983         | 84080302 | 78.93  | 947186 | 82.79    |
| 16.750         | 22445182 | 21.07  | 196872 | 17.21    |

| Totals | Area      | Area % | Height  | Height % |
|--------|-----------|--------|---------|----------|
|        | 106525484 | 100.00 | 1144058 | 100.00   |

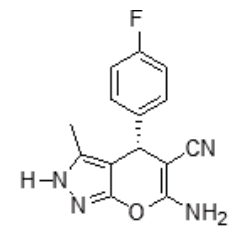

**Area % Report**

Method Name: C:\EZStart\Projects\Default\Methods\OJ-H.met  
 Data: C:\EZStart\Projects\Default\Data\I-SG-131-racemic  
 User: System  
 Acquired: 10/9/2008 5:48:08 PM  
 Printed: 12/21/2008 1:34:55 PM

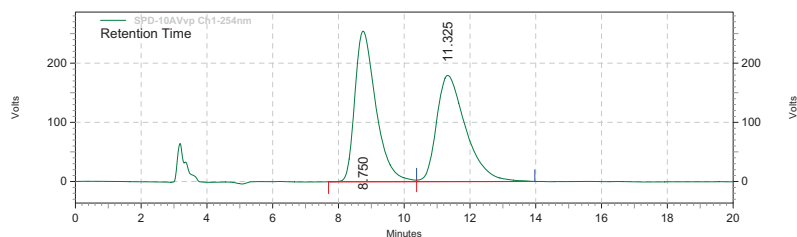

SPD-10AVvp  
Ch1-254nm  
Results

| Retention Time | Area     | Area % | Height | Height % |
|----------------|----------|--------|--------|----------|
| 8.750          | 11316227 | 50.67  | 254674 | 58.66    |
| 11.325         | 11018985 | 49.33  | 179485 | 41.34    |

|        |          |        |        |        |
|--------|----------|--------|--------|--------|
| Totals | 22335212 | 100.00 | 434159 | 100.00 |
|--------|----------|--------|--------|--------|

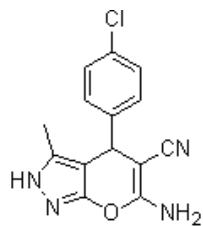

**12c (racemic)**

**Area % Report**

Method Name: C:\EZStart\Projects\Default\Methods\OJ-H.met  
 Data: C:\EZStart\Projects\Default\Data\I-SG-159  
 User: System  
 Acquired: 10/3/2008 7:03:23 PM  
 Printed: 12/22/2008 1:06:18 PM

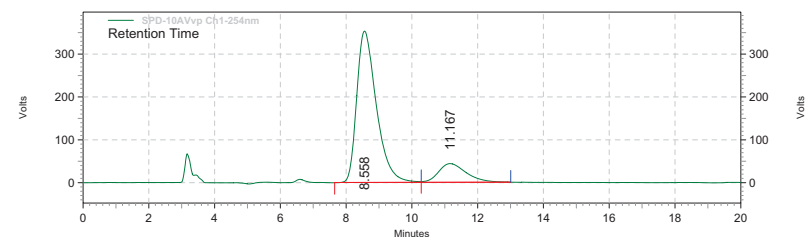

SPD-10AVvp  
Ch1-254nm  
Results

| Retention Time | Area     | Area % | Height | Height % |
|----------------|----------|--------|--------|----------|
| 8.558          | 14625485 | 85.21  | 352982 | 89.02    |
| 11.167         | 2538032  | 14.79  | 43556  | 10.98    |

|        |          |        |        |        |
|--------|----------|--------|--------|--------|
| Totals | 17163517 | 100.00 | 396538 | 100.00 |
|--------|----------|--------|--------|--------|

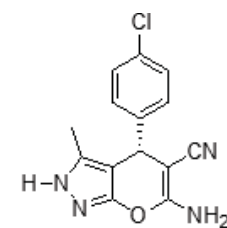

**12c (70% ee, entry 6 of Table 3)**

**Area % Report**

Method Name: C:\EZStart\Projects\Default\Methods\OJ-H.met  
 Data: C:\EZStart\Projects\Default\Data\I-SG-129-1ml-254-AS-20%-racmi  
 User: System  
 Acquired: 9/26/2008 5:00:22 PM  
 Printed: 12/21/2008 1:40:27 PM

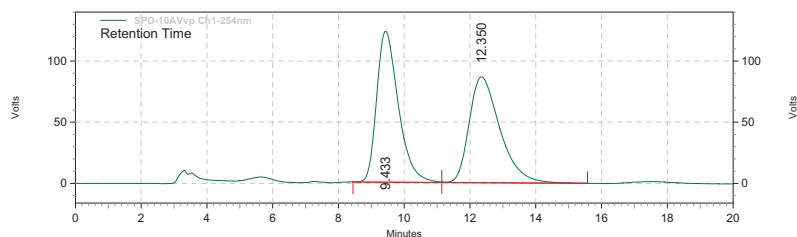

SPD-10AVvp  
Ch1-254nm  
Results

| Retention Time | Area    | Area % | Height | Height % |
|----------------|---------|--------|--------|----------|
| 9.433          | 5645369 | 50.11  | 123453 | 58.79    |
| 12.350         | 5621329 | 49.89  | 86534  | 41.21    |

| Totals | Area     | Area % | Height | Height % |
|--------|----------|--------|--------|----------|
|        | 11266698 | 100.00 | 209987 | 100.00   |

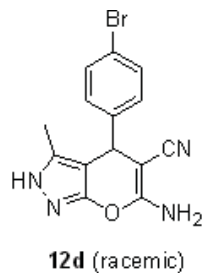**Area % Report**

Method Name: C:\EZStart\Projects\Default\Methods\OJ-H.met  
 Data: C:\EZStart\Projects\Default\Data\I-SG-320  
 User: System  
 Acquired: 11/28/2008 2:16:10 PM  
 Printed: 12/21/2008 1:38:27 PM

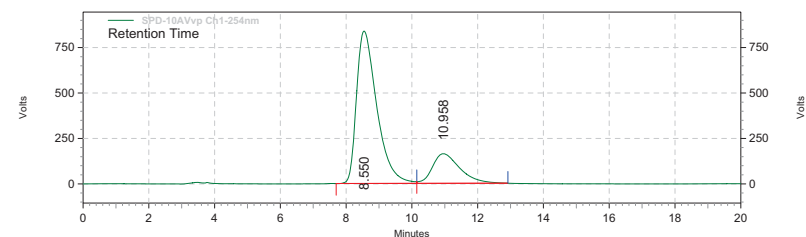

SPD-10AVvp  
Ch1-254nm  
Results

| Retention Time | Area     | Area % | Height | Height % |
|----------------|----------|--------|--------|----------|
| 8.550          | 35867009 | 79.19  | 838073 | 83.70    |
| 10.958         | 9422890  | 20.81  | 163181 | 16.30    |

| Totals | Area     | Area % | Height  | Height % |
|--------|----------|--------|---------|----------|
|        | 45289899 | 100.00 | 1001254 | 100.00   |

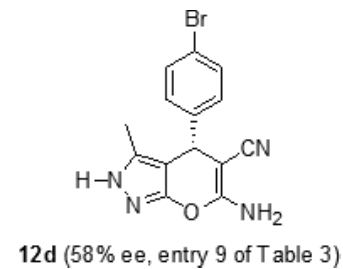



### Area % Report

Method Name: C:\EZStart\Projects\Default\Methods\OJ-H.met  
 Data: C:\EZStart\Projects\Default\Data\I-SG-212-20%-254-1ml-212  
 User: System  
 Acquired: 10/20/2008 6:36:32 PM  
 Printed: 12/21/2008 1:46:31 PM

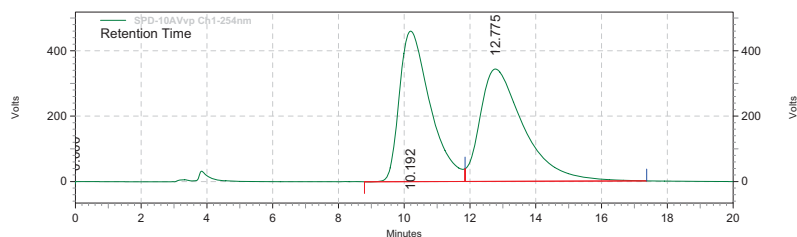

SPD-10AVvp  
 Ch1-254nm  
 Results

| Retention Time | Area     | Area % | Height | Height % |
|----------------|----------|--------|--------|----------|
| 0.000          | 0        | 0.00   | 0      | 0.00     |
| 10.192         | 29938848 | 48.68  | 459920 | 57.27    |
| 12.775         | 31560936 | 51.32  | 343222 | 42.73    |

| Totals | Area     | Area % | Height | Height % |
|--------|----------|--------|--------|----------|
|        | 61499784 | 100.00 | 803142 | 100.00   |

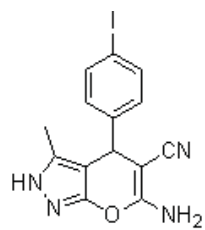

**12e** (racemic)

### Area % Report

Method Name: C:\EZStart\Projects\Default\Methods\OJ-H.met  
 Data: C:\EZStart\Projects\Default\Data\I-SG-248  
 User: System  
 Acquired: 10/29/2008 7:04:21 PM  
 Printed: 12/21/2008 1:48:19 PM

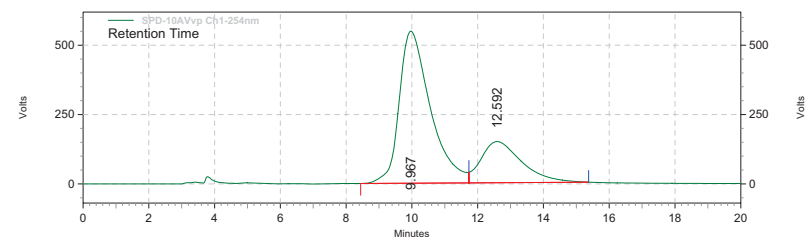

SPD-10AVvp  
 Ch1-254nm  
 Results

| Retention Time | Area     | Area % | Height | Height % |
|----------------|----------|--------|--------|----------|
| 9.967          | 36089822 | 73.88  | 548082 | 78.71    |
| 12.592         | 12759267 | 26.12  | 148255 | 21.29    |

| Totals | Area     | Area % | Height | Height % |
|--------|----------|--------|--------|----------|
|        | 48849089 | 100.00 | 696337 | 100.00   |

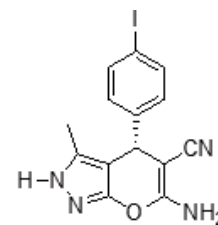

**12e** (48% ee, entry 5 of Table 2)

### Area % Report

Method Name: C:\EZStart\Projects\Default\Methods\OJ-H.met  
 Data: C:\EZStart\Projects\Default\Data\I-SG-305-20%-1mL-254-305  
 User: System  
 Acquired: 11/19/2008 5:59:11 PM  
 Printed: 12/21/2008 1:52:33 PM

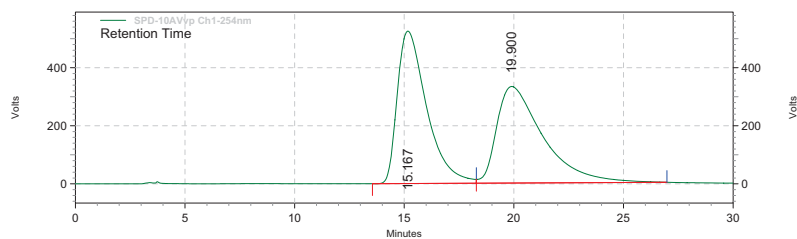

SPD-10AVvp  
Ch1-254nm  
Results

| Retention Time | Area     | Area % | Height | Height % |
|----------------|----------|--------|--------|----------|
| 15.167         | 48896030 | 50.03  | 525003 | 61.21    |
| 19.900         | 48846572 | 49.97  | 332648 | 38.79    |

| Totals | 97742602 | 100.00 | 857651 | 100.00 |
|--------|----------|--------|--------|--------|
|--------|----------|--------|--------|--------|

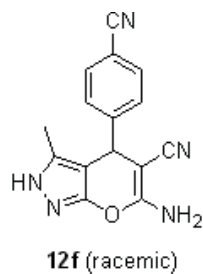

### Area % Report

Method Name: C:\EZStart\Projects\Default\Methods\OJ-H.met  
 Data: C:\EZStart\Projects\Default\Data\I-SG-302-20%-1mL-254-302  
 User: System  
 Acquired: 11/19/2008 6:33:27 PM  
 Printed: 12/21/2008 1:53:59 PM

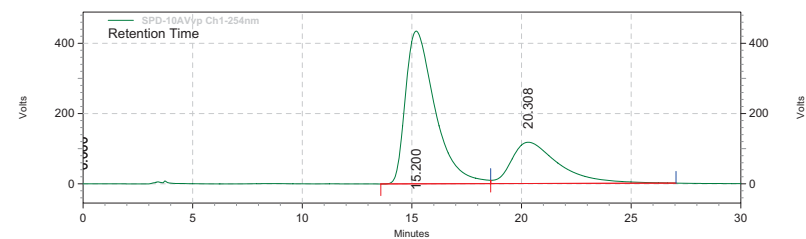

SPD-10AVvp  
Ch1-254nm  
Results

| Retention Time | Area     | Area % | Height | Height % |
|----------------|----------|--------|--------|----------|
| 0.000          | 0        | 0.00   | 0      | 0.00     |
| 0.000          | 0        | 0.00   | 0      | 0.00     |
| 15.200         | 40625451 | 69.72  | 434743 | 78.71    |
| 20.308         | 17646038 | 30.28  | 117558 | 21.29    |

| Totals | 58271489 | 100.00 | 552301 | 100.00 |
|--------|----------|--------|--------|--------|
|--------|----------|--------|--------|--------|

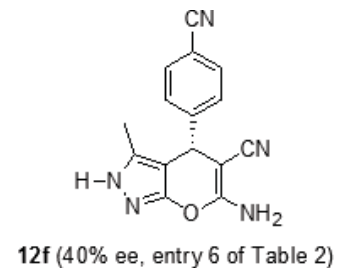

**Area % Report**

Method Name: C:\EZStart\Projects\Default\Methods\OJ-H.met  
 Data: C:\EZStart\Projects\Default\Data\I-SG-124-1ml-254-AS-20%-racm  
 User: System  
 Acquired: 9/26/2008 12:26:06 PM  
 Printed: 12/21/2008 2:01:10 PM

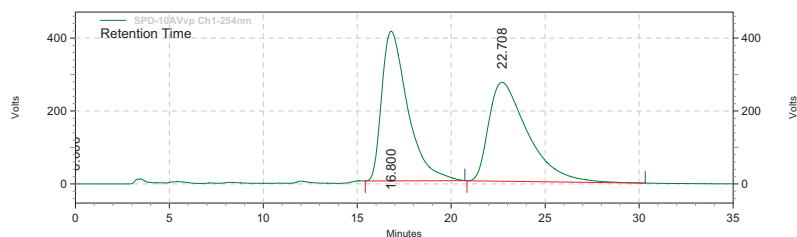

SPD-10AVvp  
 Ch1-254nm  
 Results

| Retention Time | Area     | Area % | Height | Height % |
|----------------|----------|--------|--------|----------|
| 0.000          | 0        | 0.00   | 0      | 0.00     |
| 16.800         | 39372627 | 50.18  | 410693 | 60.21    |
| 22.708         | 39083567 | 49.82  | 271403 | 39.79    |

| Totals | Area     | Area % | Height | Height % |
|--------|----------|--------|--------|----------|
|        | 78456194 | 100.00 | 682096 | 100.00   |

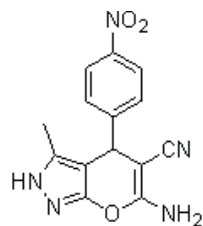

**12g (racemic)**

**Area % Report**

Method Name: C:\EZStart\Projects\Default\Methods\OJ-H.met  
 Data: C:\EZStart\Projects\Default\Data\I-SG-303-20%-1mL-254-303  
 User: System  
 Acquired: 11/19/2008 4:33:44 PM  
 Printed: 12/21/2008 1:56:53 PM

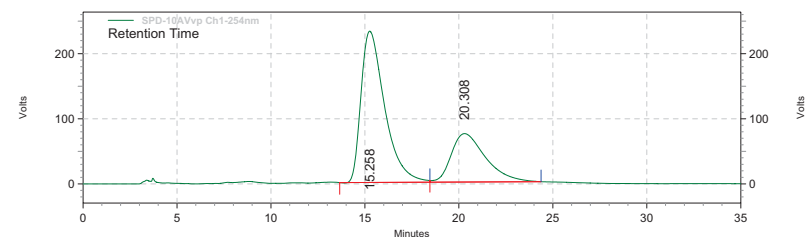

SPD-10AVvp  
 Ch1-254nm  
 Results

| Retention Time | Area     | Area % | Height | Height % |
|----------------|----------|--------|--------|----------|
| 15.258         | 20328254 | 68.31  | 232415 | 75.75    |
| 20.308         | 9428889  | 31.69  | 74406  | 24.25    |

| Totals | Area     | Area % | Height | Height % |
|--------|----------|--------|--------|----------|
|        | 29757143 | 100.00 | 306821 | 100.00   |

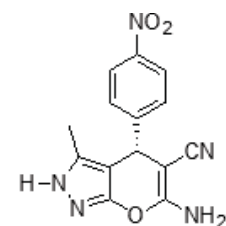

**12g (36% ee, entry 7 of Table 2)**

### Area % Report

Method Name: C:\EZStart\Projects\Default\Methods\OJ-H.met  
 Data: C:\EZStart\Projects\Default\Data\I-SG-304-15%-1mL-254-304  
 User: System  
 Acquired: 11/19/2008 2:43:51 PM  
 Printed: 12/21/2008 2:06:21 PM

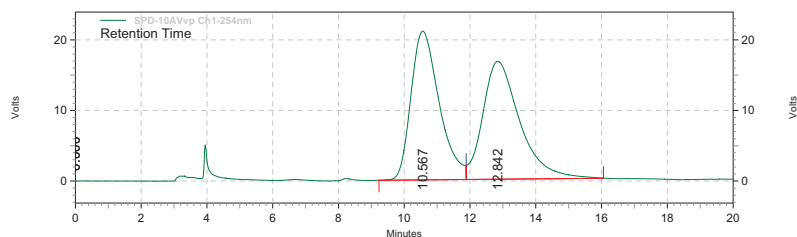

SPD-10AVvp  
 Ch1-254nm  
 Results

| Retention Time | Area    | Area % | Height | Height % |
|----------------|---------|--------|--------|----------|
| 0.000          | 0       | 0.00   | 0      | 0.00     |
| 0.000          | 0       | 0.00   | 0      | 0.00     |
| 10.567         | 1256699 | 49.11  | 21073  | 55.79    |
| 12.842         | 1302498 | 50.89  | 16700  | 44.21    |

| Totals | Area    | Area % | Height | Height % |
|--------|---------|--------|--------|----------|
| Totals | 2559197 | 100.00 | 37773  | 100.00   |

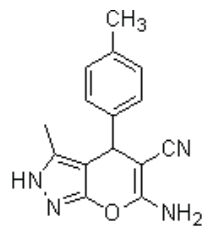

**12h** (racemic)

### Area % Report

Method Name: C:\EZStart\Projects\Default\Methods\OJ-H.met  
 Data: C:\EZStart\Projects\Default\Data\I-SG-301-15%-1mL-254-301  
 User: System  
 Acquired: 11/19/2008 3:13:39 PM  
 Printed: 12/21/2008 2:04:35 PM

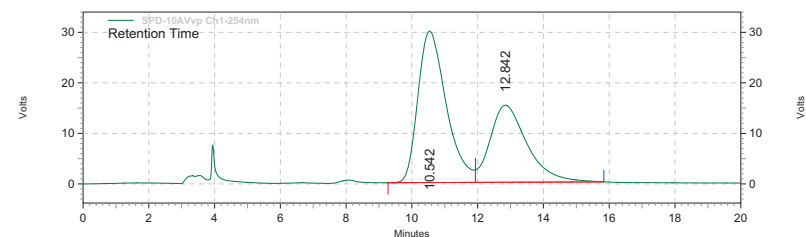

SPD-10AVvp  
 Ch1-254nm  
 Results

| Retention Time | Area    | Area % | Height | Height % |
|----------------|---------|--------|--------|----------|
| 10.542         | 1791940 | 60.13  | 29945  | 66.26    |
| 12.842         | 1188138 | 39.87  | 15251  | 33.74    |

| Totals | Area    | Area % | Height | Height % |
|--------|---------|--------|--------|----------|
| Totals | 2980078 | 100.00 | 45196  | 100.00   |

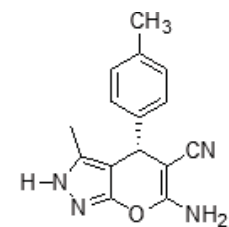

**12h** (20% ee, entry 8 of Table 2)

**Area % Report**

Method Name: C:\EZStart\Projects\Default\Methods\OJ-H.met  
 Data: C:\EZStart\Projects\Default\Data\I-SG-10%-1mL-254-142  
 User: System  
 Acquired: 9/29/2008 3:02:59 PM  
 Printed: 12/21/2008 2:13:31 PM

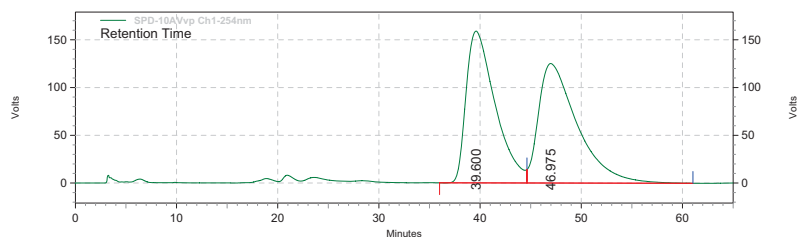

SPD-10AVvp  
Ch1-254nm  
Results

| Retention Time | Area     | Area % | Height | Height % |
|----------------|----------|--------|--------|----------|
| 39.600         | 31695259 | 48.79  | 158916 | 55.94    |
| 46.975         | 33266710 | 51.21  | 125153 | 44.06    |

| Totals | Area     | Area % | Height | Height % |
|--------|----------|--------|--------|----------|
|        | 64961969 | 100.00 | 284069 | 100.00   |

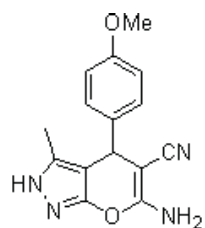

**12i** (racemic)

**Area % Report**

Method Name: C:\EZStart\Projects\Default\Methods\OJ-H.met  
 Data: C:\EZStart\Projects\Default\Data\I-SG-207  
 User: System  
 Acquired: 10/20/2008 10:25:10 AM  
 Printed: 12/21/2008 2:09:35 PM

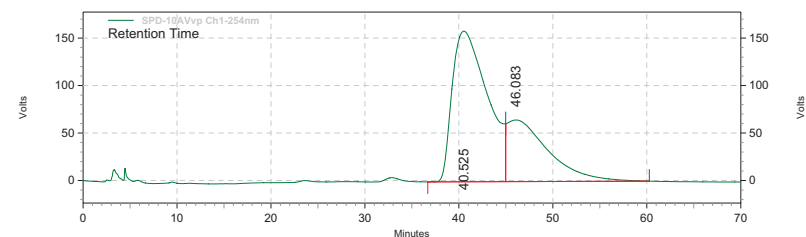

SPD-10AVvp  
Ch1-254nm  
Results

| Retention Time | Area     | Area % | Height | Height % |
|----------------|----------|--------|--------|----------|
| 40.525         | 41345215 | 67.63  | 158639 | 70.96    |
| 46.083         | 19786494 | 32.37  | 64920  | 29.04    |

| Totals | Area     | Area % | Height | Height % |
|--------|----------|--------|--------|----------|
|        | 61131709 | 100.00 | 223559 | 100.00   |

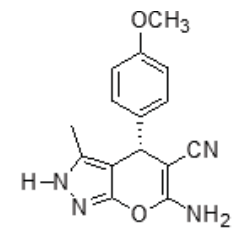

**12i** (36% ee, entry 9 of Table 2)

**Area % Report**

Method Name: C:\EZStart\Projects\Default\Methods\OJ-H.met  
 Data: C:\EZStart\Projects\Default\Data\I-SG-235-5%-254-1ml-235-racemic  
 User: System  
 Acquired: 10/27/2008 10:04:17 AM  
 Printed: 12/21/2008 2:27:48 PM

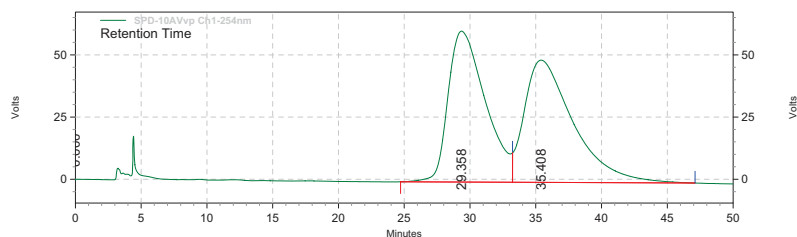

SPD-10AVvp  
 Ch1-254nm  
 Results

| Retention Time | Area     | Area % | Height | Height % |
|----------------|----------|--------|--------|----------|
| 0.000          | 0        | 0.00   | 0      | 0.00     |
| 29.358         | 11942950 | 48.51  | 60657  | 55.24    |
| 35.408         | 12675248 | 51.49  | 49148  | 44.76    |

| Totals | Area     | Area % | Height | Height % |
|--------|----------|--------|--------|----------|
|        | 24618198 | 100.00 | 109805 | 100.00   |

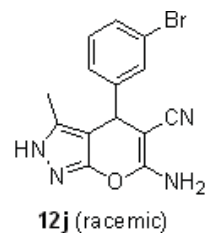**Area % Report**

Method Name: C:\EZStart\Projects\Default\Methods\OJ-H.met  
 Data: C:\EZStart\Projects\Default\Data\I-SG-235-5%-254-1ml-235-t  
 User: System  
 Acquired: 10/27/2008 8:52:39 AM  
 Printed: 12/21/2008 2:25:09 PM

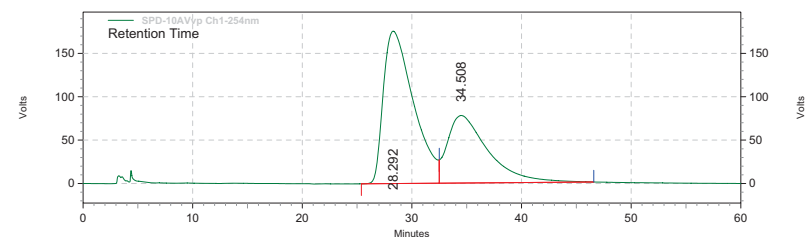

SPD-10AVvp  
 Ch1-254nm  
 Results

| Retention Time | Area     | Area % | Height | Height % |
|----------------|----------|--------|--------|----------|
| 28.292         | 33593143 | 62.64  | 175734 | 69.29    |
| 34.508         | 20036306 | 37.36  | 77877  | 30.71    |

| Totals | Area     | Area % | Height | Height % |
|--------|----------|--------|--------|----------|
|        | 53629449 | 100.00 | 253611 | 100.00   |

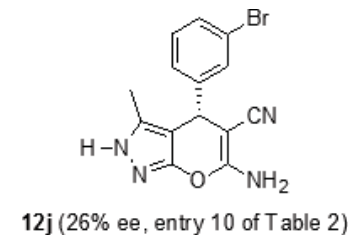

### Area % Report

Method Name: C:\EZStart\Projects\Default\Methods\OJ-H.met  
 Data: C:\EZStart\Projects\Default\Data\I-SG-254-5%-254-1ml-bl-254-rac  
 User: System  
 Acquired: 11/3/2008 10:44:27 AM  
 Printed: 12/21/2008 2:54:42 PM

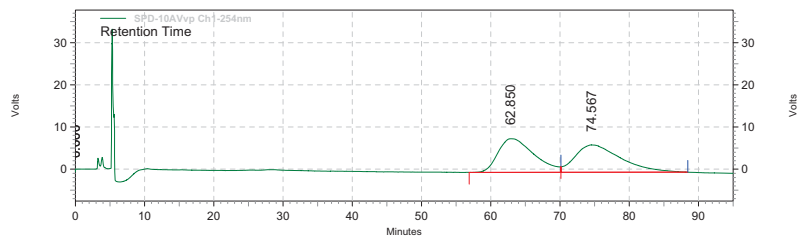

SPD-10AVvp  
 Ch1-254nm  
 Results

| Retention Time | Area    | Area % | Height | Height % |
|----------------|---------|--------|--------|----------|
| 0.000          | 0       | 0.00   | 0      | 0.00     |
| 0.000          | 0       | 0.00   | 0      | 0.00     |
| 62.850         | 2880233 | 49.22  | 7960   | 55.11    |
| 74.567         | 2970934 | 50.78  | 6484   | 44.89    |

| Totals | Area    | Area % | Height | Height % |
|--------|---------|--------|--------|----------|
| Totals | 5851167 | 100.00 | 14444  | 100.00   |

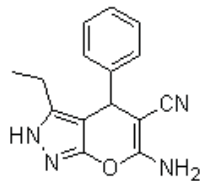

12k (racemic)

### Area % Report

Method Name: C:\EZStart\Projects\Default\Methods\OJ-H.met  
 Data: C:\EZStart\Projects\Default\Data\I-SG-257-5%-254-1ml-bl-257-op  
 User: System  
 Acquired: 11/3/2008 12:29:37 PM  
 Printed: 12/21/2008 2:31:36 PM

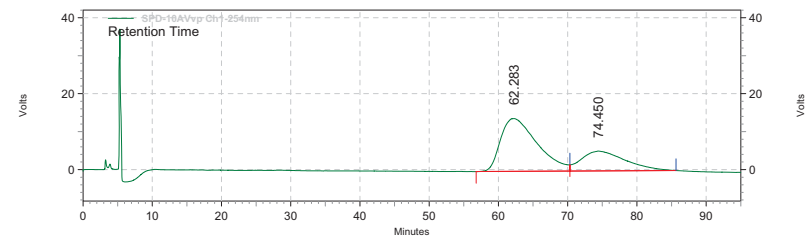

SPD-10AVvp  
 Ch1-254nm  
 Results

| Retention Time | Area    | Area % | Height | Height % |
|----------------|---------|--------|--------|----------|
| 62.283         | 5097794 | 68.88  | 13911  | 72.64    |
| 74.450         | 2303372 | 31.12  | 5240   | 27.36    |

| Totals | Area    | Area % | Height | Height % |
|--------|---------|--------|--------|----------|
| Totals | 7401166 | 100.00 | 19151  | 100.00   |

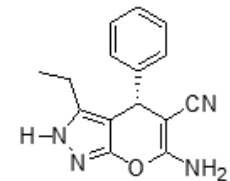

12k (38% ee, entry 11 of Table 2)

### Area % Report

Method Name: C:\EZStart\Projects\Default\Methods\OJ-H.met  
 Data: C:\EZStart\Projects\Default\Data\I-SG-518-10%-adh-1ml-254-518  
 User: System  
 Acquired: 2/19/2009 10:23:46 AM  
 Printed: 2/19/2009 4:47:00 PM

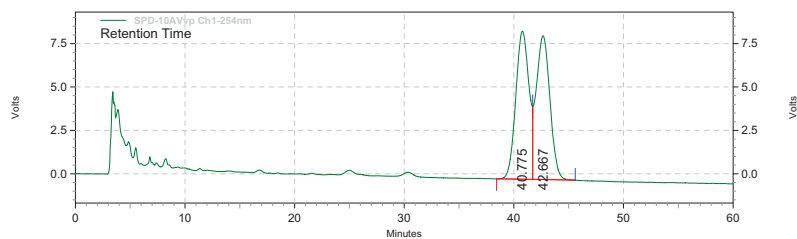

SPD-10AVvp  
Ch1-254nm  
Results

| Retention Time | Area   | Area % | Height | Height % |
|----------------|--------|--------|--------|----------|
| 40.775         | 712308 | 49.69  | 8529   | 50.72    |
| 42.667         | 721321 | 50.31  | 8286   | 49.28    |

| Totals | Area    | Area % | Height | Height % |
|--------|---------|--------|--------|----------|
|        | 1433629 | 100.00 | 16815  | 100.00   |

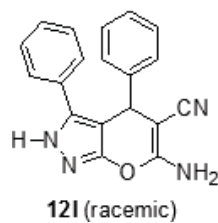

### Area % Report

Method Name: C:\EZStart\Projects\Default\Methods\OJ-H.met  
 Data: C:\EZStart\Projects\Default\Data\I-SG-518-10%-adh-1ml-254-518-op  
 User: System  
 Acquired: 2/19/2009 11:28:00 AM  
 Printed: 2/19/2009 4:48:22 PM

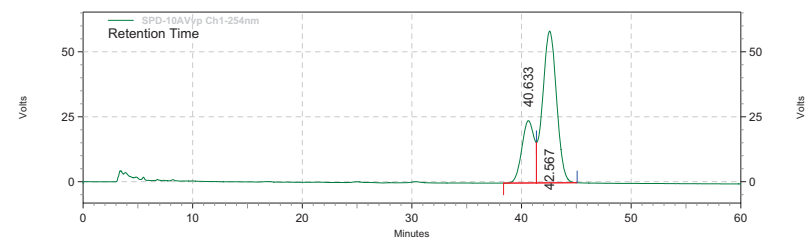

SPD-10AVvp  
Ch1-254nm  
Results

| Retention Time | Area    | Area % | Height | Height % |
|----------------|---------|--------|--------|----------|
| 40.633         | 1866353 | 26.40  | 23998  | 29.12    |
| 42.567         | 5202005 | 73.60  | 58400  | 70.88    |

| Totals | Area    | Area % | Height | Height % |
|--------|---------|--------|--------|----------|
|        | 7068358 | 100.00 | 82398  | 100.00   |

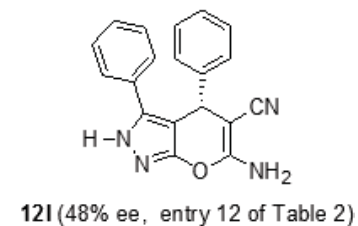



**Area % Report**

Method Name: C:\EZStart\Projects\Default\Methods\OJ-H.met  
 Data: C:\EZStart\Projects\Default\Data\1-SG-AS-254-5%-1ml-179-2nd time  
 User: System  
 Acquired: 10/12/2008 4:36:26 PM  
 Printed: 2/19/2009 4:39:56 PM

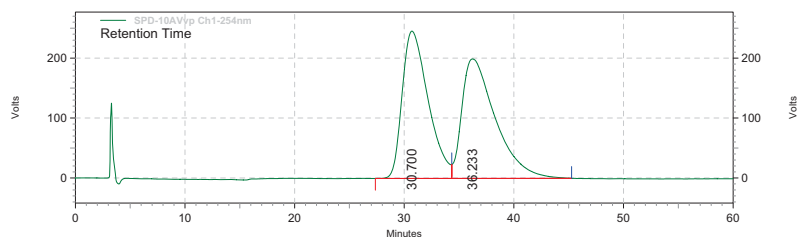

SPD-10AVvp  
Ch1-254nm  
Results

| Retention Time | Area     | Area % | Height | Height % |
|----------------|----------|--------|--------|----------|
| 30.700         | 40444851 | 48.87  | 245816 | 55.22    |
| 36.233         | 42318567 | 51.13  | 199330 | 44.78    |

|        |          |        |        |        |
|--------|----------|--------|--------|--------|
| Totals | 82763418 | 100.00 | 445146 | 100.00 |
|--------|----------|--------|--------|--------|

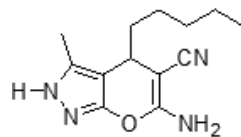

**12m (racemic)**

**Area % Report**

Method Name: C:\EZStart\Projects\Default\Methods\OJ-H.met  
 Data: C:\EZStart\Projects\Default\Data\1-SG-AS-254-5%-1ml-178  
 User: System  
 Acquired: 10/12/2008 2:35:06 PM  
 Printed: 2/19/2009 4:42:13 PM

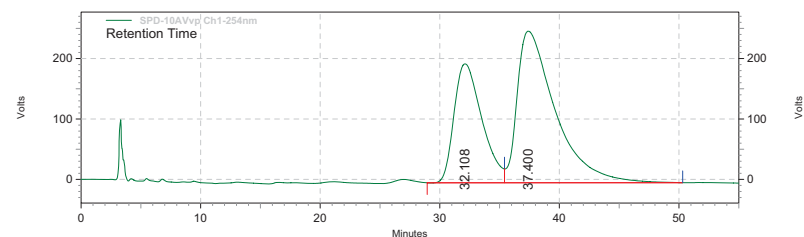

SPD-10AVvp  
Ch1-254nm  
Results

| Retention Time | Area     | Area % | Height | Height % |
|----------------|----------|--------|--------|----------|
| 32.108         | 31857570 | 36.43  | 196807 | 43.95    |
| 37.400         | 55597266 | 63.57  | 250964 | 56.05    |

|        |          |        |        |        |
|--------|----------|--------|--------|--------|
| Totals | 87454836 | 100.00 | 447771 | 100.00 |
|--------|----------|--------|--------|--------|

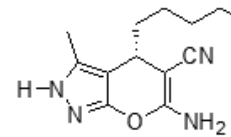

**12m (28% ee, entry 13 of Table 2)**
